# Supplementary material for: Potato (Solanum tuberosum L.) tuber ageing induces changes in the proteome and antioxidants associated with the sprouting pattern
Source: PubMed Central journal article supplement — J Exp Bot. 2009 Feb 9;60(4):1273–88. doi: 10.1093/jxb/erp008 (PMC2657538; doi:10.1093/jxb/erp008), 2009-02-09
Supplement: erp008_1.pdf [file erp008_1.pdf]

**Potato (*Solanum tuberosum* L.) tuber ageing induces changes in the proteome and antioxidants associated with the sprouting pattern.** Pierre Delaplace, Marie-Laure Fauconnier, Kjell Sergeant, Jean-François Dierick, Mouhssin Oufir, Froukje van der Wal, Antoine H.P. America, Jenny Renaut, Jean-François Hausman, and Patrick du Jardin.

## Supplementary data

**Fig. S1.** Changes in the lipid oxidation context during ageing. The carotenoid content (A) was measured spectrophotometrically according to Morris *et al.* (2004) after acetone extraction. The LOX activity assay was based on the measurement of the absorbance of conjugated dienes produced by the enzyme according to the method originally developed by Surrey (1964). The presented data are means of three independent replicates  $\pm$  SD. Means sharing the same letter were not statistically distinct using the Newman and Keuls test.

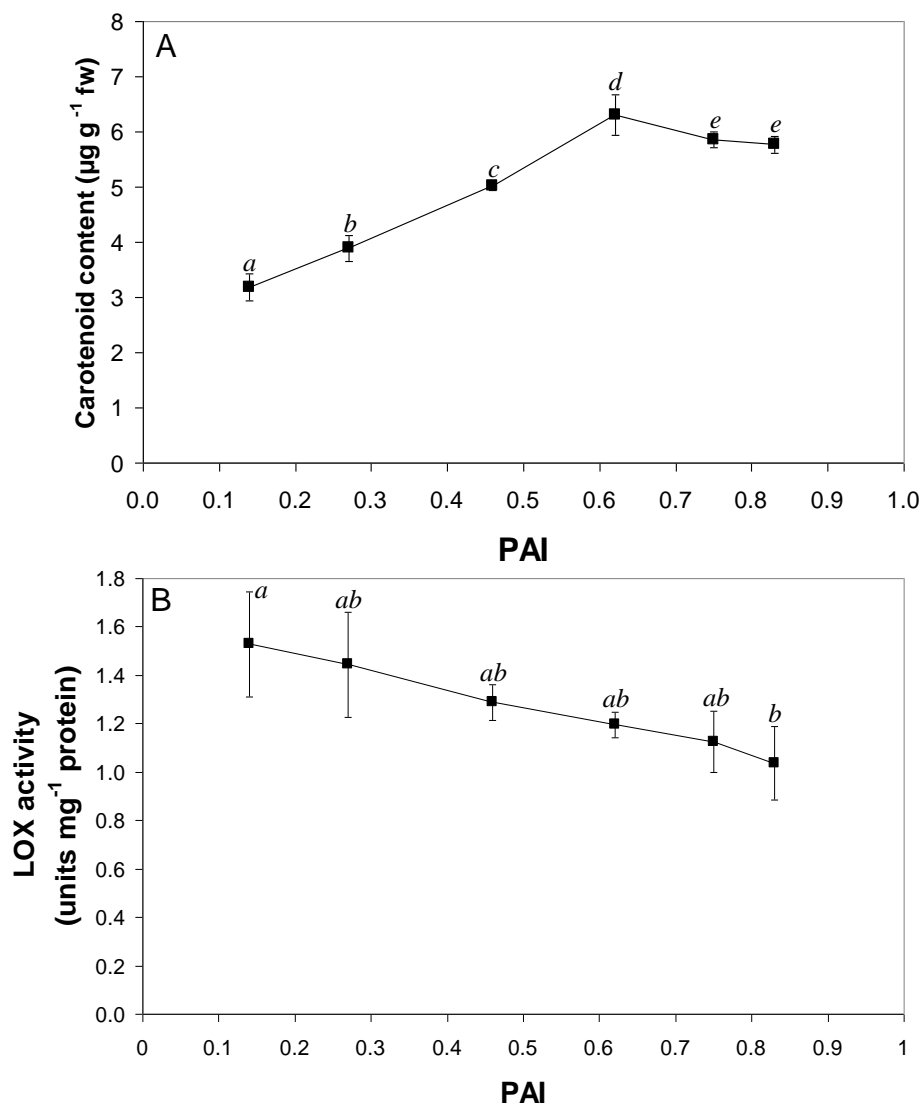

**Table S1.** MS/MS identifications of up-regulated proteins during potato ageing\*.

| Spot | Protein                                     | Organism<br>Gi Accession                       | Pept | experim.<br>Mr | calc.<br>Mr | Mass<br>$\Delta$ | Sequences                           | E value  | Pept.<br>score |
|------|---------------------------------------------|------------------------------------------------|------|----------------|-------------|------------------|-------------------------------------|----------|----------------|
| 26   | Phosphoglycerate mutase                     | <i>Solanum tuberosum</i><br>L.<br>Gi 4582924   | 2    | 1546,7427      | 1546,6939   | 0,0488           | K.ALEYEDFKDFDR.V                    | 0,028    | 46             |
|      |                                             |                                                |      | 1427,8027      | 1427,7521   | 0,0506           | R.DAILSHKFDQVR.V                    | 0,5      | 33             |
| 21   | Enolase                                     | <i>Solanum lycopersicum</i> L.<br>Gi 19281     | 5    | 1803,9327      | 1803,9366   | -0,0039          | R.AAVPSGASTGIYEALRL.D               | 0,0038   | 54             |
|      |                                             |                                                |      | 2003,0927      | 2003,0951   | -0,0024          | K.LVLPVPAFNVINGGSHAGNK.L            | 3,90E-07 | 92             |
|      |                                             |                                                |      | 1859,8327      | 1859,8173   | 0,0154           | K.SYDLNFKKEESNDGSQK.I               | 0,0075   | 50             |
|      |                                             |                                                |      | 1910,9727      | 1910,9633   | 0,0094           | K.LAMQEFMILPVGAANFK.E               | 1,50E-05 | 81             |
|      |                                             |                                                |      | 1895,9527      | 1895,9489   | 0,0038           | R.GNPTVEVDVHVSNGVFAR.A              | 1,10E-05 | 79             |
| 23   | $\alpha$ -glucane phosphorylase (precursor) | <i>Solanum tuberosum</i><br>L.<br>Gi 217999    | 3    | 1334,8127      | 1334,7710   | 0,0417           | R.QLLNIFGIVYR.Y                     | 0,001    | 58             |
|      |                                             |                                                |      | 2524,1427      | 2524,1141   | 0,0286           | R.SGAFGSYNYDDLIGSLEGNEGFR.A         | 3,30E-10 | 122            |
|      |                                             |                                                |      | 1924,9917      | 1924,9682   | 0,0235           | K.FVPDERFEEVKEFVR.S                 | 0,0076   | 54             |
| 25   | Tubulin ( $\beta$ -2 chain)                 | <i>Lupinus albus</i> L.<br>Gi 8928412          | 1    | 1138,6864      | 1138,6862   | 0,0002           | K.LAVNLIPFPR.L                      | 5        | 26             |
| 1    | Class I small Heat Shock Protein 1A         | <i>Nicotiana tabacum</i><br>L.<br>Gi 37704399  | 6    | 914,5510       | 914,5185    | 0,0325           | R.ILQISGER.S                        | 0,13     | 42             |
|      |                                             |                                                |      | 993,5229       | 993,4879    | 0,0350           | R.ETSVFANAR.I                       | 0,68     | 37             |
|      |                                             |                                                |      | 1042,5427      | 1042,5083   | 0,0344           | R.ETSVFAYAR.I                       | 0,89     | 34             |
|      |                                             |                                                |      | 1001,6027      | 1001,5658   | 0,0370           | R.FRLPENVK.M                        | 3,4      | 25             |
|      |                                             |                                                |      | 2974,5027      | 2974,5188   | -0,0161          | R.SNIVDPLSLHIGDPFEGFPIANPPSSVR.E    | 8,50E-05 | 66             |
|      |                                             |                                                |      | 1575,8627      | 1575,8442   | 0,0185           | K.FRLPENVKMGEIK.A                   | 0,42     | 36             |
| 20   | DREPP4                                      | <i>Nicotiana tabacum</i><br>L.<br>Gi 7801133   | 4    | 1446,8127      | 1446,7969   | 0,0158           | K.VLEIYEAHAVEIK.S                   | 3,4      | 27             |
|      |                                             |                                                |      | 2497,2727      | 2497,2739   | -0,0012          | K.AVSEASSNFGPSYVSGPILFVLEK.V        | 2,1      | 25             |
|      |                                             |                                                |      | 1620,8727      | 1620,8762   | -0,0035          | K.FLDELVKIEFPGSK.A                  | 0,012    | 49             |
|      |                                             |                                                |      | 3186,5827      | 3185,6091   | 0,9736           | K.VSTFIVVTEDKKGEPPAAAADDVHATATSVK.E | 4,40E+02 | 19             |
| 15   | Catalase                                    | <i>Solanum tuberosum</i><br>L.<br>Gi 40950550  | 3    | 1083,5727      | 1083,5349   | 0,0378           | R.IFAYADTQR.H                       | 77       | 14             |
|      |                                             |                                                |      | 1608,9327      | 1608,8875   | 0,0452           | K.TWPEDLLPLIPVGR.L                  | 0,027    | 45             |
|      |                                             |                                                |      | 1556,8327      | 1556,8020   | 0,0307           | R.IGPNYMQLPVNAPK.C                  | 0,077    | 41             |
| 5    | Glyoxalase I                                | <i>Oryza sativa</i> L.<br>Gi 4126809           | 5    | 1542,8227      | 1542,8253   | -0,0025          | K.SAEVNVLTQELGGK.I                  | 0,055    | 43             |
|      |                                             |                                                |      | 2424,2527      | 2424,2688   | -0,0161          | K.GGSTVIAFVKDPDGYLFEILQR.E          | 0,016    | 27             |
|      |                                             |                                                |      | 1480,8327      | 1480,8361   | -0,0034          | K.ITRQPGSIPGLNTK.I                  | 16       | 18             |
|      |                                             |                                                |      | 1110,5927      | 1110,6033   | -0,0106          | R.QPGSIPGLNTK.I                     | 3,30E+02 | 7              |
|      |                                             |                                                |      | 913,4707       | 913,4909    | -0,0202          | R.SIKFYEK.A                         | 5,7      | 25             |
| 11   | 20S proteasome subunit                      | <i>Glycine max</i> (L.)<br>Merr.<br>Gi 7839485 | 3    | 2263,2827      | 2263,2827   | 0,0001           | R.LFQVEYAIKLGSTAIGIK.T              | 0,092    | 38             |
|      |                                             |                                                |      | 1327,8127      | 1327,7823   | 0,0305           | K.TKEGVVLAWEKR.I                    | 22       | 30             |
|      |                                             |                                                |      | 1726,8127      | 1726,7910   | 0,0217           | R.TEYDRGVNTFSPEGR.L                 | 5,3      | 25             |
| 16   | 5-Lipoxygenase (breakdown product)          | <i>Solanum tuberosum</i><br>L.<br>Gi 2789652   | 3    | 1658,9327      | 1658,9395   | -0,0068          | R.LYEGGIKLPQGPLFK.A                 | 0,13     | 52             |
|      |                                             |                                                |      | 1911,0727      | 1911,0829   | -0,0102          | R.IPLILSLDIYVPRDER.F                | 8,4      | 19             |
|      |                                             |                                                |      | 1510,9127      | 1510,9123   | 0,0005           | R.IPLILSLDIYVPR.D                   | 3,3      | 21             |

\*Each identification mentions the protein name, its Gi accession number as well as the organism, the number of fragmented peptides matching a database entry, the experimental and calculated relative molecular weights, the difference between both MW values, the peptide sequences, the E values and the peptide scores.

**Table S1.** MS/MS identifications of up-regulated proteins during potato ageing (continued)\*.

| Spot | Protein              | Organism<br>Gi Accession                   | Pept | Experim.<br>Mr | Calc. Mr  | Mass<br>$\Delta$ | Sequences                              | E value   | Pept.<br>score |
|------|----------------------|--------------------------------------------|------|----------------|-----------|------------------|----------------------------------------|-----------|----------------|
| 2    | Patatin precursor    | <i>Solanum tuberosum</i> L.<br>Gij73426671 | 3    | 1704,9025      | 1704,8967 | 0,0058           | -.TLGEMVTVLSIDGGGIK.G                  | 3,50E-009 | 120            |
|      |                      |                                            |      | 1756,9445      | 1756,9359 | 0,0086           | R.VHQALTEVAISSFDIK.T                   | 9,50E-009 | 115            |
|      |                      |                                            |      | 3641,7100      | 3641,8035 | -0,0934          | R.LADYFDVIGGTSTGGLLTAMITTPNENRPFAAAK.D | 4,7       | 27             |
| 3    | Patatin (A3 group)   | <i>Solanum tuberosum</i> L.<br>Gij84316375 | 2    | 1046,6096      | 1046,6124 | -0,0028          | K.TNKPVIFTK.S                          | 3,8       | 29             |
|      |                      |                                            |      | 1756,9298      | 1756,9359 | -0,0061          | R.VHQALTEVAISSFDIK.T                   | 2,90E-008 | 111            |
| 4    | Patatin 04           | <i>Solanum tuberosum</i> L.<br>Gij84316397 | 1    | 1756,9422      | 1756,9359 | 0,0063           | R.VHQALTEVAISSFDIK.T                   | 2,70E-008 | 111            |
| 6    | Patatin precursor    | <i>Solanum tuberosum</i> L.<br>Gij73426671 | 3    | 1704,9135      | 1704,8967 | 0,0168           | -.TLGEMVTVLSIDGGGIK.G                  | 1         | 35             |
|      |                      |                                            |      | 1756,9480      | 1756,9359 | 0,0121           | R.VHQALTEVAISSFDIK.T                   | 0,02      | 52             |
|      |                      |                                            |      | 1867,1079      | 1867,0818 | 0,0261           | K.GIIPGIILEFLEGQLQK.M                  | 0,0036    | 57             |
| 7    | Patatin precursor    | <i>Solanum tuberosum</i> L.<br>Gij73426675 | 1    | 1756,9345      | 1756,9359 | -0,0014          | R.VHQALTEVAISSFDIK.T                   | 0,00021   | 72             |
| 8    | Patatin precursor    | <i>Solanum tuberosum</i> L.<br>Gij129640   | 2    | 1498,7930      | 1498,7820 | 0,0108           | K.IFEPSPGFHLVEPK.Y                     | 3,1       | 28             |
|      |                      |                                            |      | 1756,9430      | 1756,9359 | 0,0068           | R.VHQALTEVAISSFDIK.T                   | 0,00034   | 67             |
| 9    | Patatin precursor    | <i>Solanum tuberosum</i> L.<br>Gij73426683 | 1    | 1875,9011      | 1875,8962 | 0,0049           | K.SVSEDNHETYEVALKR.F                   | 0,00059   | 68             |
| 10   | Patatin 07           | <i>Solanum tuberosum</i> L.<br>Gij84316403 | 3    | 1463,6743      | 1463,6892 | -0,0149          | K.DNPETYEEALKR.F                       | 92        | 15             |
|      |                      |                                            |      | 1875,8630      | 1875,8962 | -0,0335          | K.SVSEDNHETYEVALKR.F                   | 2,8       | 28             |
|      |                      |                                            |      | 1288,683       | 1288,6663 | 0,0164           | R.LAQEDPAFASIK.S                       | 0,0051    | 56             |
| 12   | Patatin precursor    | <i>Solanum tuberosum</i> L.<br>Gij73426683 | 2    | 1498,7801      | 1498,7820 | -0,0018          | K.IFEPSPGFHLVEPK.Y                     | 1,80E+002 | 12             |
|      |                      |                                            |      | 1756,9350      | 1756,9359 | -0,0009          | R.VHQALTEVAISSFDIK.T                   | 1,9       | 32             |
| 13   | Patatin precursor    | <i>Solanum tuberosum</i> L.<br>Gij73426683 | 2    | 1704,9192      | 1704,8967 | 0,0225           | -.TLGEMVTVLSIDGGGIK.G                  | 2,2       | 32             |
|      |                      |                                            |      | 1756,9458      | 1756,9359 | 0,0099           | R.VHQALTEVAISSFDIK.T                   | 0,00069   | 67             |
| 14   | Patatin precursor    | <i>Solanum tuberosum</i> L.<br>Gij73426683 | 2    | 1498,7857      | 1498,7820 | 0,0038           | K.IFEPSPGFHLVEPK.Y                     | 1,6       | 33             |
|      |                      |                                            |      | 1756,9358      | 1756,9359 | -0,0001          | R.VHQALTEVAISSFDIK.T                   | 0,00024   | 71             |
| 17   | Patatin precursor    | <i>Solanum tuberosum</i> L.<br>Gij73426671 | 3    | 1756,9331      | 1756,9359 | -0,0028          | R.VHQALTEVAISSFDIK.T                   | 1,2E+002  | 14             |
|      |                      |                                            |      | 1204,6150      | 1204,5724 | 0,0426           | R.AEEDPAFASIR.S                        | 1,1E+002  | 15             |
|      |                      |                                            |      | 1360,7130      | 1360,6735 | 0,0392           | R.RAEEDPAFASIR.S                       | 22        | 20             |
| 18   | Patatin precursor    | <i>Solanum tuberosum</i> L.<br>Gij73426683 | 2    | 1046,5801      | 1046,6124 | -0,0323          | K.TNKPVIFTK.S                          | 1,50E+002 | 14             |
|      |                      |                                            |      | 1288,6227      | 1288,6663 | -0,0436          | R.LAQEDPAFASIK.S                       | 3         | 30             |
| 19   | Patatin precursor T5 | <i>Solanum tuberosum</i> L.<br>Gij129644   | 4    | 1166,5800      | 1166,6005 | -0,0208          | K.YLMQVLQEKL.L                         | 0,083     | 45             |
|      |                      |                                            |      | 1834,9650      | 1834,9676 | -0,0029          | K.QMLLLSLGTGTNSEFDK.T                  | 0,0085    | 53             |
|      |                      |                                            |      | 1360,6630      | 1360,6735 | -0,0108          | R.RAEEDPAFASIR.S                       | 0,0023    | 58             |
|      |                      |                                            |      | 1756,9430      | 1756,9359 | 0,0068           | R.VHQALTEVAISSFDIK.T                   | 0,00018   | 71             |

**Table S2.** MS/MS identifications of down-regulated proteins during potato ageing\*.

| Spot | Protein                             | Organism<br>Gi Accession                           | Pept | experim.<br>Mr | calc.<br>Mr | Mass<br>$\Delta$ | Sequences                   | E value  | Pept.<br>score |
|------|-------------------------------------|----------------------------------------------------|------|----------------|-------------|------------------|-----------------------------|----------|----------------|
| 22   | Actin                               | <i>Gossypium hirsutum</i><br>L.<br>Gi 32186906     | 3    | 1773,8974      | 1773,8897   | 0,0078           | K.NYELPDGQVITIGAER.F        | 0,42     | 39             |
|      |                                     |                                                    |      | 1882,9412      | 1882,9312   | 0,0100           | K.LAYVALDYEQELETAR.S        | 0,0041   | 59             |
|      |                                     |                                                    |      | 2492,2305      | 2492,2394   | -0,0089          | R.SSSSIEKNYELPDGQVITIGAER.F | 1E+002   | 15             |
| 29   | Elongation factor                   | <i>Oryza sativa</i> L.<br>Gi 115456914             | 2    | 1345,7667      | 1345,7717   | -0,0050          | R.VIYASQLTAKPR.L            | 2,5E+002 | 11             |
|      |                                     |                                                    |      | 1741,9002      | 1741,9038   | -0,0036          | K.AYLPVVESFGFSGTLR.A        | 9,3      | 26             |
| 27   | Protein disulfide isomerase         | <i>Ipomoea batatas</i> (L.)<br>Lam.<br>Gi 47933777 | 3    | 1037,6247      | 1037,5981   | 0,0266           | R.GGPVVKPTLR.L              | 46       | 16             |
|      |                                     |                                                    |      | 1904,0727      | 1904,0367   | 0,0361           | K.SQPIPEVNDEPVKVVVR.D       | 0,0019   | 55             |
|      |                                     |                                                    |      | 1556,8227      | 1556,7946   | 0,0281           | K.LRGEVDFAHTVDAK.H          | 9,3      | 21             |
| 28   | Protein disulfide isomerase         | <i>Ipomoea batatas</i> (L.)<br>Lam.<br>Gi 47933777 | 3    | 1548,8527      | 1548,8147   | 0,0380           | R.TKEAIIIEFIESNR.D          | 3,7      | 24             |
|      |                                     |                                                    |      | 1904,0727      | 1904,0367   | 0,0361           | K.SQPIPEVNDEPVKVVVR.D       | 0,51     | 31             |
|      |                                     |                                                    |      | 1556,8227      | 1556,7946   | 0,0281           | K.LRGEVDFAHTVDAK.H          | 9,9      | 20             |
| 24   | 26S Proteasome regulatory subunit 7 | <i>Prunus persica</i> (L.)<br>Batsch<br>Gi 3172331 | 3    | 1406,6127      | 1406,6062   | 0,0066           | R.FDDGVGGDNEVQR.T           | 5,9      | 23             |
|      |                                     |                                                    |      | 1388,7327      | 1388,7299   | 0,0028           | R.KVEFGLPDLESR.T            | 1,00E+02 | 11             |
|      |                                     |                                                    |      | 1738,8427      | 1738,8348   | 0,0079           | K.ACIVFFDEVDAIGGAR.F        | 14       | 19             |
| 30   | Lipoxygenase I                      | <i>Solanum tuberosum</i> L.<br>Gi 585417           | 3    | 1658,9352      | 1658,9395   | -0,0043          | R.LYEGGIKLPQGPLFK.A         | 0,44     | 33             |
|      |                                     |                                                    |      | 1261,6427      | 1261,6455   | -0,0028          | K.NTHINEFFLK.S              | 0,00011  | 72             |
|      |                                     |                                                    |      | 2074,0527      | 2074,0694   | -0,0167          | K.VSFQLISSVQGDPTNGLQGK.H    | 0,017    | 46             |
| 31   | Lipoxygenase                        | <i>Solanum tuberosum</i> L.<br>Gi 1495816          | 3    | 1658,9527      | 1658,9395   | 0,0132           | R.LYEGGIKLPQGPLFK.A         | 0,00033  | 64             |
|      |                                     |                                                    |      | 2134,1127      | 2134,1098   | 0,0029           | R.IFFANQPYPSETPELLR.K       | 0,0011   | 58             |
|      |                                     |                                                    |      | 1911,1027      | 1911,0829   | 0,0198           | R.IPLILSLDIYVPRDR.F         | 0,016    | 46             |

\*Each identification mentions the protein name, its Gi accession number as well as the organism, the number of fragmented peptides matching a database entry, the experimental and calculated relative molecular weights, the difference between both MW values, the peptide sequences, the E values and the peptide scores.

**Table S3.** Up-regulated protein abundance kinetics during ageing: partim patatin breakdown products.

The p values corresponding to ANOVA using PAI as fixed factor are presented as well as the ratios between extreme abundance values. Critical PAI values corresponding to the major changes are also presented in the table. Standard abundances as a function of PAI are displayed in the graphics.

| Spot # | Protein            | Organism<br>Gi Accession                   | Physiological function                                              | p<br>ANOVA | Abundance<br>ratio | Critical<br>PAI           | Expression kinetics                                                                   |
|--------|--------------------|--------------------------------------------|---------------------------------------------------------------------|------------|--------------------|---------------------------|---------------------------------------------------------------------------------------|
| 2      | Patatin precursor  | <i>Solanum tuberosum</i> L.<br>Gi 73426671 | Patatin breakdown products, amino acid source for protein synthesis | 0.018      | 4.34               | 0.6                       | 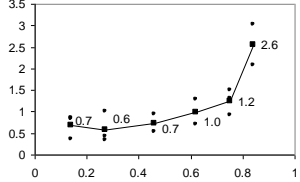   |
| 3      | Patatin (A3 group) | <i>Solanum tuberosum</i> L.<br>Gi 84316375 | Patatin breakdown products, amino acid source for protein synthesis | 0.014      | 3.43               | 0.6                       |    |
| 4      | Patatin 04         | <i>Solanum tuberosum</i> L.<br>Gi 84316397 | Patatin breakdown products, amino acid source for protein synthesis | 0.026      | 3.28               | 0.4                       |   |
| 6      | Patatin precursor  | <i>Solanum tuberosum</i> L.<br>Gi 73426671 | Patatin breakdown products, amino acid source for protein synthesis | 0.0037     | 3.25               | 0.6                       |  |
| 7      | Patatin precursor  | <i>Solanum tuberosum</i> L.<br>Gi 73426675 | Patatin breakdown products, amino acid source for protein synthesis | 4.4E-005   | 4.94               | -<br>(steady progression) |  |

| Spot # | Protein           | Organism<br>Gi Accession                   | Physiological function                                                 | p<br>ANOVA | Abundance<br>ratio | Critical<br>PAI | Expression kinetics |
|--------|-------------------|--------------------------------------------|------------------------------------------------------------------------|------------|--------------------|-----------------|---------------------|
| 8      | Patatin precursor | <i>Solanum tuberosum</i> L.<br>Gi 129640   | Patatin breakdown products, amino acid<br>source for protein synthesis | 0.00023    | 3.17               | 0.6             |                     |
| 9      | Patatin precursor | <i>Solanum tuberosum</i> L.<br>Gi 73426683 | Patatin breakdown products, amino acid<br>source for protein synthesis | 0.0047     | 3.62               | 0.6             |                     |
| 10     | Patatin 07        | <i>Solanum tuberosum</i> L.<br>Gi 84316403 | Patatin breakdown products, amino acid<br>source for protein synthesis | 0.011      | 2.74               | 0.6             |                     |
| 12     | Patatin precursor | <i>Solanum tuberosum</i> L.<br>Gi 73426683 | Patatin breakdown products, amino acid<br>source for protein synthesis | 0.0094     | 3.75               | 0.6             |                     |
| 13     | Patatin precursor | <i>Solanum tuberosum</i> L.<br>Gi 73426683 | Patatin breakdown products, amino acid<br>source for protein synthesis | 0.00058    | 4.31               | 0.6             |                     |

| Spot # | Protein              | Organism<br>Gi Accession                   | Physiological function                                                 | p<br>ANOVA | Abundance<br>ratio | Critical<br>PAI              | Expression kinetics |
|--------|----------------------|--------------------------------------------|------------------------------------------------------------------------|------------|--------------------|------------------------------|---------------------|
| 14     | Patatin precursor    | <i>Solanum tuberosum</i> L.<br>Gi 73426683 | Patatin breakdown products, amino acid<br>source for protein synthesis | 0.00013    | 4.88               | 0.6                          |                     |
| 17     | Patatin precursor    | <i>Solanum tuberosum</i> L.<br>Gi 73426671 | Patatin breakdown products, amino acid<br>source for protein synthesis | 0.048      | 2.09               | 0.4                          |                     |
| 18     | Patatin precursor    | <i>Solanum tuberosum</i> L.<br>Gi 73426683 | Patatin breakdown products, amino acid<br>source for protein synthesis | 0.0081     | 3.30               | 0.4                          |                     |
| 19     | Patatin precursor T5 | <i>Solanum tuberosum</i> L.<br>Gi 129644   | Patatin breakdown products, amino acid<br>source for protein synthesis | 0.034      | 2.55               | -<br>(steady<br>progression) |                     |
